# Supplementary material for: Analysis of the Composition of Lyophilisates Obtained from Aloe arborescens Gel of Leaves of Different Ages from Controlled Crops
Source: MDPI journal article supplement (doi:10.3390/molecules26113204), 2021-05-27
Supplement: s1 [file s1]

## Supplementary materials

Analysis of the composition of lyophilisates obtained from *Aloe arborescens* gel of leaves of different ages from controlled crops

Kamil Pawłowicz, Dominika Ludowicz, Marta Karaźniewicz-Łada, Kamil Wdowiak and Judyta Cielecka-Piontek

**Table S1.** Validation parameters of HPLC-DAD method.

| Parameter                             | Aloin A                  | Aloenin A                 |
|---------------------------------------|--------------------------|---------------------------|
| Retention time – R <sub>T</sub> (min) | 16.46                    | 12.68                     |
| Correlation coefficient – r           | 0.9997                   | 0.9998                    |
| Range of linearity (mg/mL)            | 0.0044–0.044             | 0.013–0.13                |
| LOD(mg/mL)                            | 0.1981                   | 0.0917                    |
| LOQ (mg/mL)                           | 0.6003                   | 0.2780                    |
| Slope (a ± S <sub>a</sub> )           | 26231752.21 ± 1574687.52 | 25840498.78 ± 718467.9855 |
| Intercept (b ± S <sub>b</sub> )       | 130541.2931 ± 44364.84   | –18415.9487 ± 54327.93115 |

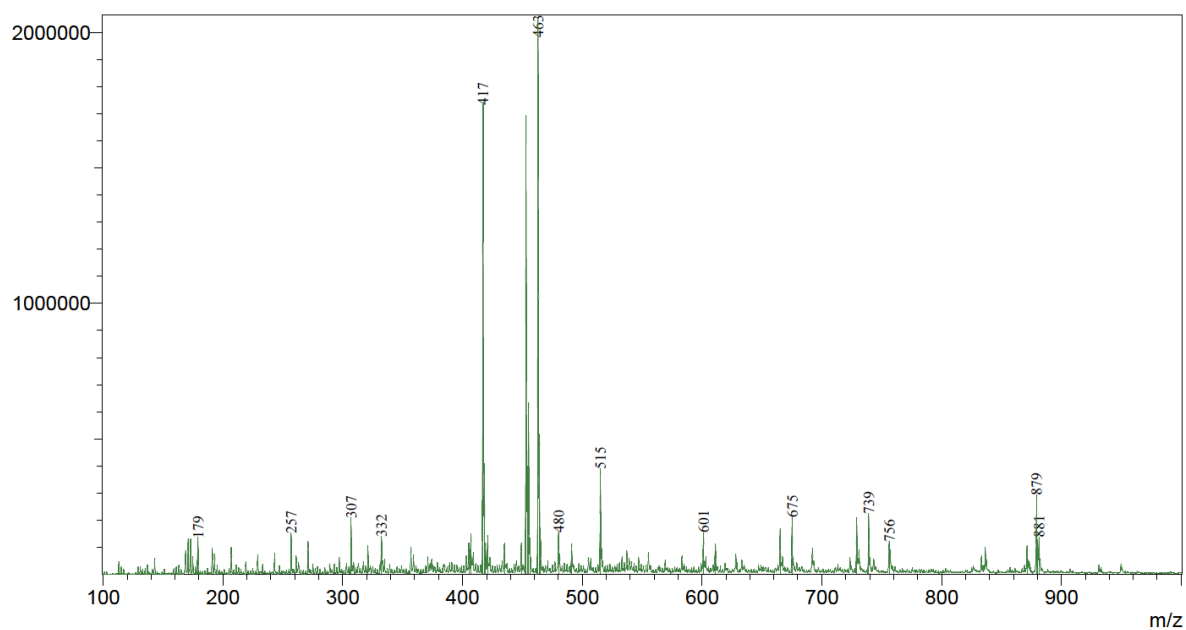

**Figure S1.** Mass spectra for aloin A.

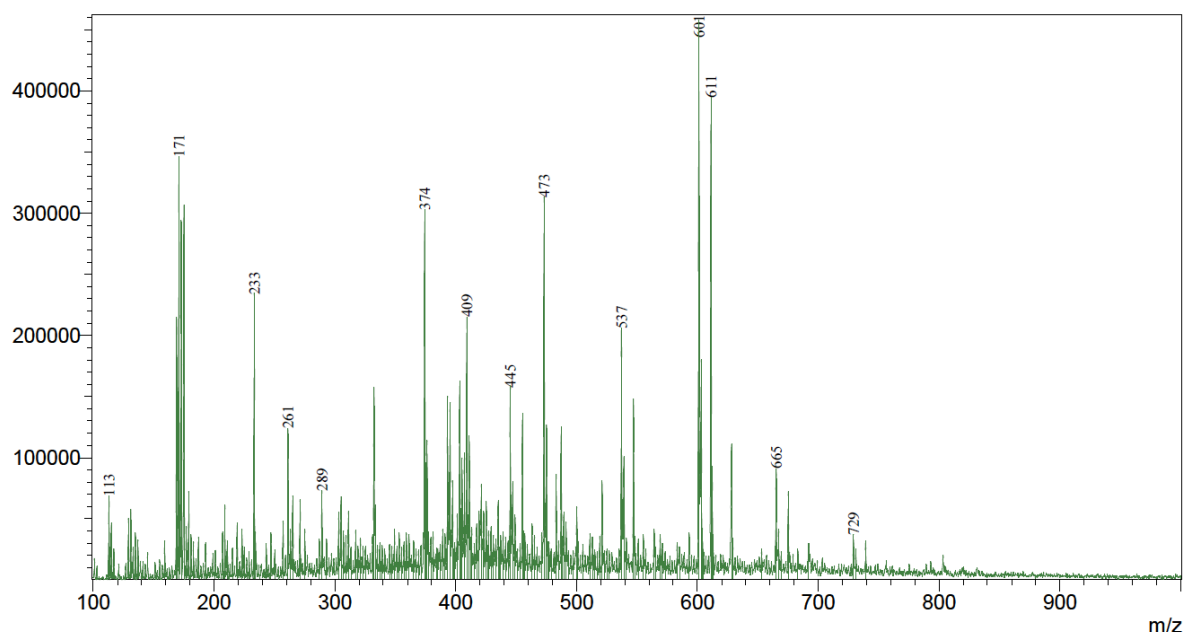

**Figure S2.** Mass spectra for aloenin A.

The HPLC-DAD method developed for the purpose of aloin A and aloenin A determinations in studied extracts, was conducted according to the following conditions of the mobile phase composition.

**Table S2.** HPLC-DAD method gradient. Mobile phase consists of methanol – Phase A and water – Phase B.

| Time (min)  | Phase A concentration (%) | Phase B concentration (%) |
|-------------|---------------------------|---------------------------|
| 0.0–13.99   | 35                        | 65                        |
| 14.00–17.00 | 95                        | 5                         |
| 17.01–20.0  | 35                        | 65                        |

**Table S3.** The results of statistical analysis (ANOVA test).

| Assay                             | Type of extract | <i>p</i> value |
|-----------------------------------|-----------------|----------------|
| The sum of polyphenolic compounds | water           | 0.0156         |
|                                   | ethanol         | 0.0237         |
| Phenolic acids                    | water           | 0.0237         |
|                                   | ethanol         | 0.0216         |
| CUPRAC                            | ethanol         | 0.0156         |
| DPPH                              | water           | 0.0156         |
|                                   | ethanol         | 0.0473         |
| ABTS                              | water           | 0.0245         |
|                                   | ethanol         | 0.0324         |
